# Supplementary material for: Crystal structure of blue–white–yellow color-tunable Ca4Si2O7F2:Eu2+,Mn2+ phosphor and investigation of color tunability through energy transfer for single-phase white-light near-ultraviolet LEDs
Source: Royal Society of Chemistry journal article supplement (doi:10.1039/c2jm33160h), 2012-01-01
Supplement: c2jm33160h.pdf [file c2jm33160h.pdf]

## Supporting Information for JMC

### **Crystal structure and blue-white-yellow color-tunable $\text{Ca}_4\text{Si}_2\text{O}_7\text{F}_2:\text{Eu}^{2+},\text{Mn}^{2+}$ phosphor through energy transfer for single-phase white-light near-ultraviolet LEDs**

Chien-Hao Huang,<sup>a,d\*</sup> Ting-Shan Chan,<sup>b</sup> Wei-Ren Liu,<sup>c</sup> De-Yin Wang,<sup>d</sup> Yi-Chen  
Chiu,<sup>a</sup> Yao-Tsung Yeh,<sup>a</sup> and Teng-Ming Chen<sup>d\*</sup>

<sup>a</sup> Material and Chemical Research Laboratories, Industrial Technology Research  
Institute, Hsichu, Taiwan 30011, R.O.C.

<sup>b</sup> National Synchrotron Radiation Research Center, Hsinchu Science Park, Hsinchu,  
Taiwan 30076, R.O.C.

<sup>c</sup> Department of Chemical Engineering, Chung Yuan Christian University,  
Chungli, Taiwan 32023, R.O.C.

<sup>d</sup> Phosphors Research Laboratory and Department of Applied Chemistry, National  
Chiao Tung University, Hsinchu, Taiwan 30010, R.O.C.

E-mails: [tmchen@mail.nctu.edu.tw](mailto:tmchen@mail.nctu.edu.tw); [Chien-Hao@itri.org.tw](mailto:Chien-Hao@itri.org.tw)

**Table S1** Atomic positions and lattice parameters for  $(\text{Ca}_{0.89}\text{Eu}_{0.01}\text{Mn}_{0.1})_4\text{Si}_2\text{O}_7\text{F}_2$  phosphors

| Atoms | <i>x</i>   | <i>y</i>   | <i>z</i>   | Frac | Uiso*100 |
|-------|------------|------------|------------|------|----------|
| Ca(1) | 0.1715(10) | 0.1353(7)  | 0.4274(6)  | 0.89 | 4.09(2)  |
| Ca(2) | 0.6614(10) | 0.1311(7)  | 0.4166(6)  | 0.89 | 4.38(2)  |
| Ca(3) | 0.4658(10) | 0.4160(7)  | 0.3185(6)  | 0.89 | 3.65(2)  |
| Ca(4) | 0.9723(10) | 0.4049(7)  | 0.3069(6)  | 0.89 | 3.54(2)  |
| Eu(1) | 0.1715(10) | 0.1353(7)  | 0.4274(6)  | 0.01 | 4.09(2)  |
| Eu(2) | 0.6614(10) | 0.1311(7)  | 0.4166(6)  | 0.01 | 4.38(2)  |
| Eu(3) | 0.4658(10) | 0.4160(7)  | 0.3185(6)  | 0.01 | 3.65(2)  |
| Eu(4) | 0.9723(10) | 0.4049(7)  | 0.3069(6)  | 0.01 | 3.54(2)  |
| Mn(1) | 0.1715(10) | 0.1353(7)  | 0.4274(6)  | 0.10 | 4.09(2)  |
| Mn(2) | 0.6614(10) | 0.1311(7)  | 0.4166(6)  | 0.10 | 4.38(2)  |
| Mn(3) | 0.4658(10) | 0.4160(7)  | 0.3185(6)  | 0.10 | 3.65(2)  |
| Mn(4) | 0.9723(10) | 0.4049(7)  | 0.3069(6)  | 0.10 | 3.54(2)  |
| Si(1) | 0.2737(13) | 0.1845(10) | 0.1352(8)  | 1.00 | 3.95(3)  |
| Si(2) | 0.8444(13) | 0.1952(11) | 0.1215(9)  | 1.00 | 3.53(3)  |
| O(1)  | 0.0627(26) | 0.2284(13) | 0.1175(14) | 1.00 | 4.10(5)  |
| O(2)  | 0.2794(26) | 0.0401(18) | 0.1780(16) | 1.00 | 2.30(5)  |
| O(3)  | 0.7952(26) | 0.0486(18) | 0.1493(16) | 1.00 | 3.50(6)  |
| O(4)  | 0.2638(21) | 0.2698(18) | 0.2547(14) | 1.00 | 2.70(5)  |
| O(5)  | 0.7335(22) | 0.2954(20) | 0.2418(15) | 1.00 | 3.90(5)  |
| O(6)  | 0.4121(20) | 0.2383(17) | 0.9926(13) | 1.00 | 2.30(5)  |
| O(7)  | 0.8591(24) | 0.2275(21) | 0.9730(14) | 1.00 | 5.80(6)  |
| F(1)  | 0.5506(27) | 0.4935(18) | 0.1111(16) | 1.00 | 3.20(4)  |
| F(2)  | 0.0786(24) | 0.5039(17) | 0.0999(15) | 1.00 | 3.00(5)  |

**Table S2** Selected bond distances (Å) in  $(\text{Ca}_{0.89}\text{Eu}_{0.01}\text{Mn}_{0.1})_4\text{Si}_2\text{O}_7\text{F}_2$  phosphors

|                        |              |                        |              |                        |              |
|------------------------|--------------|------------------------|--------------|------------------------|--------------|
| Ca(1)/Eu(1)/Mn(1)–O(1) | 2.43367(6) Å | Ca(2)/Eu(2)/Mn(2)–F(1) | 2.40116(6)   | Ca(4)/Eu(4)/Mn(4)–O(5) | 2.43950(5)   |
| Ca(1)/Eu(1)/Mn(1)–O(2) | 2.76098(8)   | Ca(2)/Eu(2)/Mn(2)–F(2) | 2.33407(6)   | Ca(4)/Eu(4)/Mn(4)–O(7) | 2.22327(6)   |
| Ca(1)/Eu(1)/Mn(1)–O(4) | 2.27677(6)   |                        |              | Ca(4)/Eu(4)/Mn(4)–F(2) | 2.37536(7)   |
| Ca(1)/Eu(1)/Mn(1)–O(6) | 2.53961(6)   | Ca(3)/Eu(3)/Mn(3)–O(2) | 2.33768(6) Å |                        |              |
| Ca(1)/Eu(1)/Mn(1)–O(7) | 2.66753(7)   | Ca(3)/Eu(3)/Mn(3)–O(3) | 2.34480(6)   | Si(1)–O(1)             | 1.73050(5) Å |
| Ca(1)/Eu(1)/Mn(1)–F(1) | 2.49436(6)   | Ca(3)/Eu(3)/Mn(3)–O(4) | 2.42937(5)   | Si(1)–O(2)             | 1.59836(5)   |
| Ca(1)/Eu(1)/Mn(1)–F(2) | 2.44023(6)   | Ca(3)/Eu(3)/Mn(3)–O(5) | 2.29453(6)   | Si(1)–O(4)             | 1.56821(4)   |
| Ca(1)/Eu(1)/Mn(1)–F(2) | 2.30778(6)   | Ca(3)/Eu(3)/Mn(3)–O(6) | 2.43406(6)   | Si(1)–O(6)             | 1.66004(5)   |
|                        |              | Ca(3)/Eu(3)/Mn(3)–F(1) | 2.29127(7)   |                        |              |
| Ca(2)/Eu(2)/Mn(2)–O(3) | 2.88883(9) Å |                        |              | Si(2)–O(1)             | 1.67008(5) Å |
| Ca(2)/Eu(2)/Mn(2)–O(5) | 2.50206(6)   | Ca(4)/Eu(4)/Mn(4)–O(1) | 2.69879(7) Å | Si(2)–O(3)             | 1.59677(5)   |
| Ca(2)/Eu(2)/Mn(2)–O(6) | 2.25437(6)   | Ca(4)/Eu(4)/Mn(4)–O(2) | 2.33661(6)   | Si(2)–O(5)             | 1.67711(4)   |
| Ca(2)/Eu(2)/Mn(2)–O(7) | 2.33435(5)   | Ca(4)/Eu(4)/Mn(4)–O(3) | 2.48403(5)   | Si(2)–O(7)             | 1.62614(5)   |
| Ca(2)/Eu(2)/Mn(2)–F(1) | 2.25499(5)   | Ca(4)/Eu(4)/Mn(4)–O(4) | 2.52145(6)   | Si(1)–O(1)             | 1.73050(5) Å |
